# Supplementary material for: Co3O4–CuCoO2 hybrid nanoplates as a low-cost and highly active catalyst for producing hydrogen from ammonia borane
Source: Royal Society of Chemistry journal article supplement (doi:10.1039/d0nj05524g), 2021-01-01
Supplement: d0nj05524g1.pdf [file d0nj05524g1.pdf]

# **Co<sub>3</sub>O<sub>4</sub>-CuCoO<sub>2</sub> hybrid nanoplates as a low-cost and highly active catalyst for producing hydrogen from ammonia borane**

Yufa Feng,<sup>+a, b</sup> Jinyun Liao,<sup>+b</sup> Xiaodong Chen,<sup>b</sup> Qingyu Liao,<sup>b</sup> Huize Wang,<sup>b</sup> Shan Ji,  
<sup>\*c</sup> Bruno G. Pollet,<sup>d</sup> Hao Li,<sup>\*b</sup> and Mingyang He<sup>\*a</sup>

<sup>a</sup> Jiangsu Key Laboratory of Advanced Catalytic Materials and Technology, Changzhou University, Changzhou, 213164, China.

<sup>b</sup> School of chemistry and Materials Engineering, Guangdong Provincial Key Laboratory for Electronic Functional Materials and Devices, Huizhou University, Huizhou 516007, China.

<sup>c</sup> College of Biological, Chemical Science and Chemical Engineering, Jiaying University, Jiaying, 314001, China.

<sup>d</sup> Hydrogen Energy and Sonochemistry Research Group, Department of Energy and Process Engineering, Faculty of Engineering, Norwegian University of Science and Technology, NO-7491 Trondheim, Norway.

<sup>+</sup>These authors contributed equally to this work.

<sup>\*</sup>Corresponding author.

E-mail address: lihao180@126.com (H. Li); jishan@zjxu.edu.cn (S. Ji); hmy@cczu.edu.cn (M. He)

## **Supporting information**

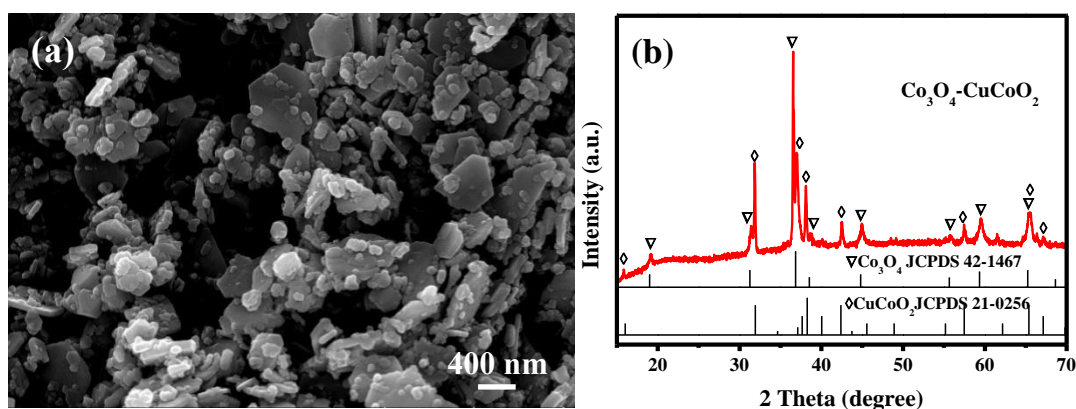

Fig. S1. SEM image (a) and XRD pattern (b) of Co<sub>3</sub>O<sub>4</sub>-CuCoO<sub>2</sub> synthesized in the absence of SDDS in the synthetic process.

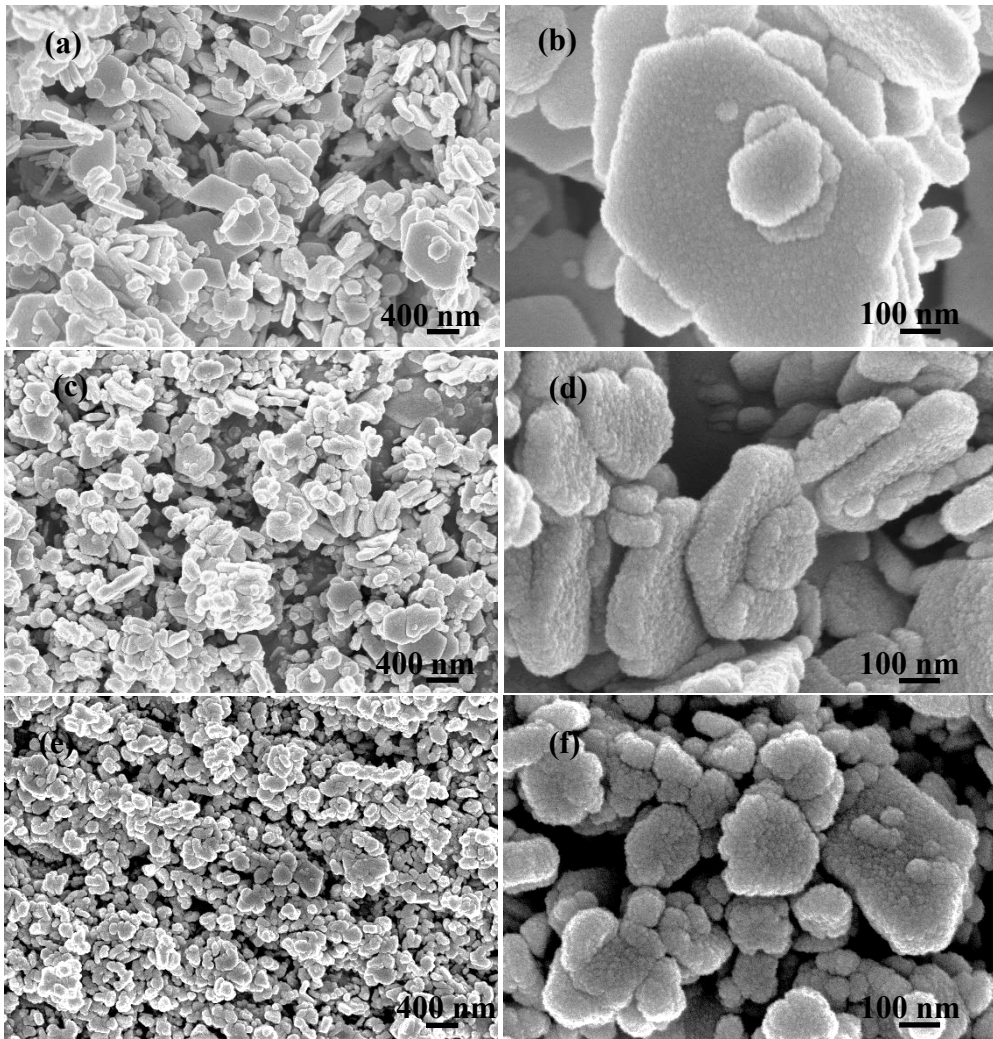

Fig. S2. SEM images of  $\text{Co}_3\text{O}_4\text{-CuCoO}_2$  with various Cu:Co ratio: 1:10 (a, b), 1:5 (c, d) and 1:2 (e, f).

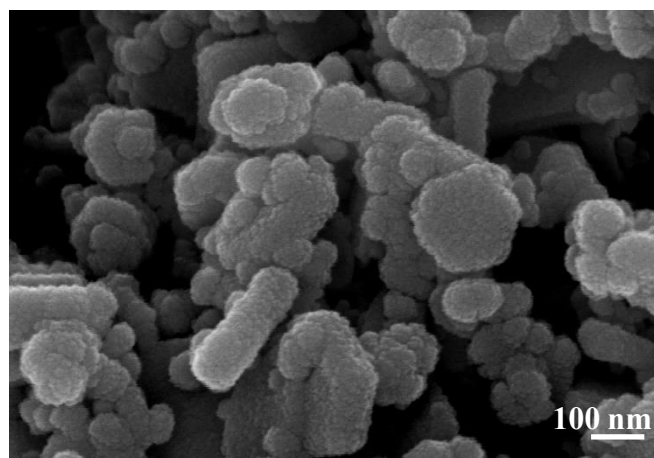

Fig. S3. SEM image of used  $\text{Co}_3\text{O}_4\text{-CuCoO}_2$ .

**Illustration S1: Calculation of  $E_a$** 

The  $E_a$  value can be calculated by the Arrhenius equation:

$$\ln k = -E_a/(RT) + \ln A$$

in which  $k$  is the hydrolysis reaction rate constant,  $R$  is the molar gas constant (8.3145 J K<sup>-1</sup> mol<sup>-1</sup>),  $T$  is the reaction temperature (K) and  $A$  is the pre-exponential factor.

As shown in Fig. 9a, the values of  $k$  can be determined from the linear portions of the volume of hydrogen vs. time plots.
